# Supplementary material
Source: PubMed Central journal article supplement (PMC3759653)
Supplement: NIHMS487337-supplement-supplement_1.pdf [file NIHMS487337-supplement-supplement_1.pdf]

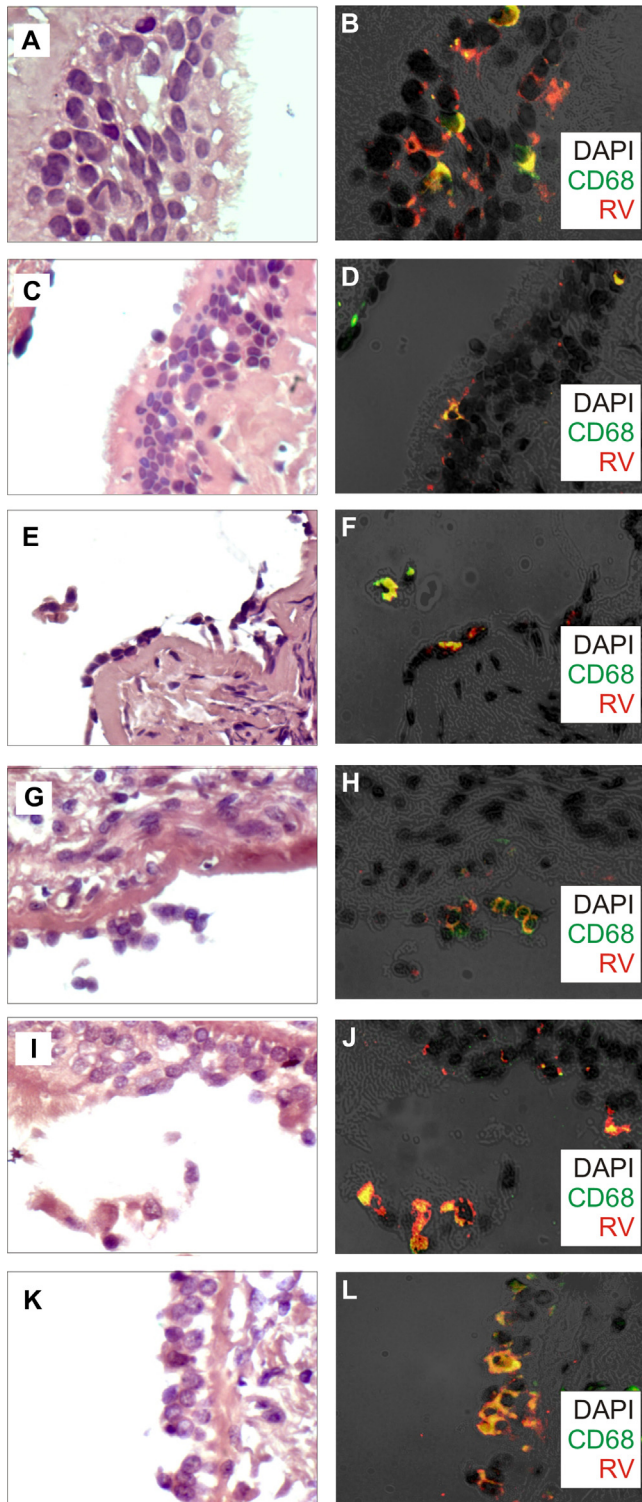

**FIG E1.** Images of bronchial epithelium from 6 adult subjects with asthma experimentally infected with RV16. **A, C, E, G, I, K,** Hematoxylin and eosin staining. **B, D, F, H, J, L,** Merged immunofluorescence images show staining for RV16 (red), CD68 (green), and DAPI (black). Sections show co-localization of RV16 and CD68 (yellow). (Original magnification,  $\times 640$ ). DAPI, 4'-6-Diamidino-2-phenylindole, dihydrochloride.

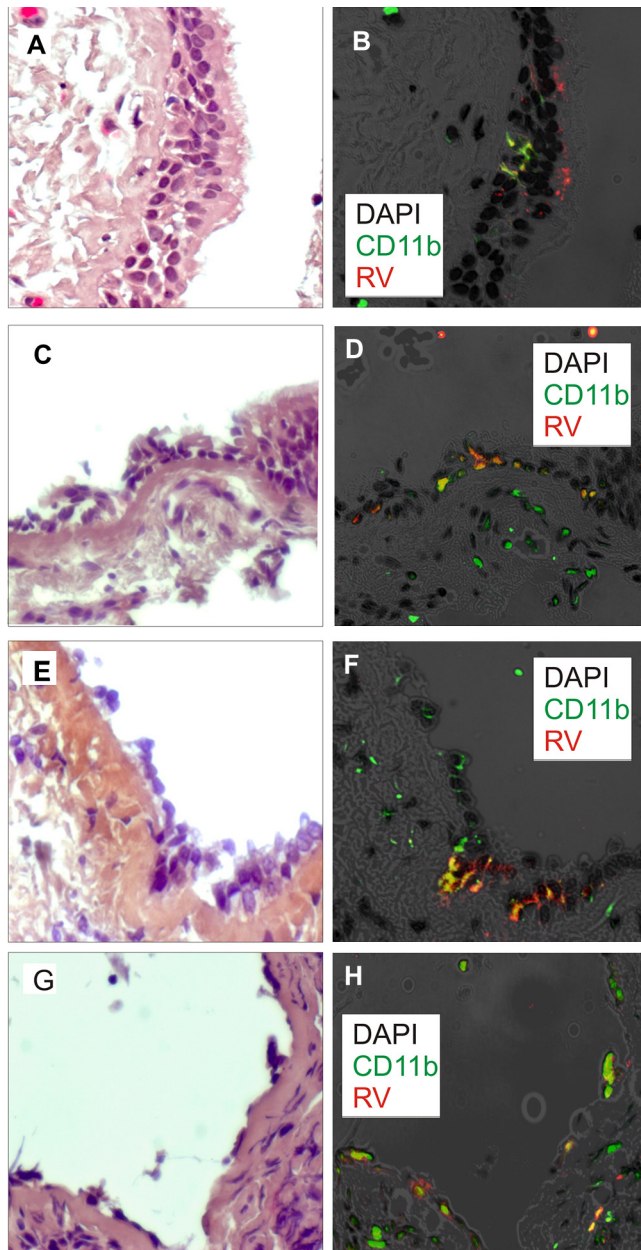

**FIG E2.** Images of bronchial epithelium from 4 subjects with asthma infected with RV16. **A, C, E, G,** Hematoxylin and eosin staining. **B, D, F, H,** Merged immunofluorescence images show staining for RV16 (red), CD11b (green), and DAPI (black). Sections show colocalization of RV16 and CD11b (yellow). (Original magnification, ×640). *DAPI*, 4'-6-Diamidino-2-phenylindole, dihydrochloride.

**TABLE E1.** RV16, CD68, CD11b, and CD11c in tissue samples from controls and asthmatic subjects experimentally infected with RV16\*

| ID | Diagnosis | Accession no. | RV16 | CD68                  | CD11b              | CD11c                 |
|----|-----------|---------------|------|-----------------------|--------------------|-----------------------|
| 13 | Control   | 02-059        | +    | + (no colocalization) |                    |                       |
| 20 | Control   | 02-076        | +    | –                     |                    |                       |
| 39 | Control   | 03-143        | –    |                       |                    |                       |
| 42 | Control   | 03-127        | +    | –                     |                    |                       |
| 1  | Asthma    | 01-037        | +    | + (colocalization)    | + (colocalization) | + (no colocalization) |
| 3  | Asthma    | 02-043A       | +    | + (colocalization)    | + (colocalization) | + (no colocalization) |
| 4  | Asthma    | 02-043B       | –    |                       |                    |                       |
| 5  | Asthma    | 02-049        | +    | + (colocalization)    | + (colocalization) | + (colocalization)    |
| 24 | Asthma    | 03-106        | +    | –                     |                    |                       |
| 27 | Asthma    | 03-096        | +    | + (colocalization)    |                    |                       |
| 30 | Asthma    | 03-097        | +    | + (colocalization)    |                    |                       |
| 33 | Asthma    | 03-110        | +    | + (colocalization)    |                    |                       |
| 36 | Asthma    | 03-125        | –    |                       |                    |                       |
| 37 | Asthma    | 03-107        | –    |                       |                    |                       |
| 45 | Asthma    | 03-136        | +    | + (colocalization)    |                    |                       |

\*Empty cells indicate that the staining was not completed.
